# Supplementary material for: The effectiveness of health impact assessment in influencing decision-making in Australia and New Zealand 2005–2009
Source: PubMed Central journal article supplement (PMC3878483; doi:10.1186/1471-2458-13-1188), 2013-12-17
Supplement: 1471-2458-13-1188-S2.pdf [file 1471-2458-13-1188-S2.pdf]

Table 1 HIAs included in study (bold = case study HIAs)

| Year | State/Region | Name of HIA                                                                                                 | Description                                                                                                        | Part of capacity-building project | Policy, Plan, Program, Project | Depth               | Sector                |
|------|--------------|-------------------------------------------------------------------------------------------------------------|--------------------------------------------------------------------------------------------------------------------|-----------------------------------|--------------------------------|---------------------|-----------------------|
| 2009 | QLD          | <b>EFHIA of alternative patterns of development of the Whitsunday Hinterland and Mackay Regional Report</b> | <b>Area plan to influence land-use planning</b>                                                                    | No                                | <b>Plan: options</b>           | <b>Rapid</b>        | <b>Land-use</b>       |
| 2009 | NSW          | <b>EFHIA of the review of Goodooga Health Service</b>                                                       | <b>Plan to change the an implementation plan to change a rural health service</b>                                  | No                                | <b>Plan: options</b>           | <b>Intermediate</b> | <b>Health service</b> |
| 2009 | Hawke's Bay  | Whakawateatia Hawke's Bay District Health Board: HIA on the proposed Air Quality Plan Change                | Plan to change air quality standards                                                                               | Yes                               | Plan: options                  | Rapid               | Air                   |
| 2009 | Wellington   | Wairarapa Non-fluoridation of water WOHIA                                                                   | Plan to implement a water fluoridation plant to supply two local governments                                       | Yes                               | Plan: options                  | Desktop             | Water                 |
| 2009 | Wellington   | HIA of Makoura Responsibility Model                                                                         | Project aimed to encourage self-responsibility and self-management in students to deal with challenging behaviour. | Yes                               | Project                        | Rapid               | Education             |
| 2009 | Hawke's Bay  | HIA on the draft Wairoa District Council Waste Management Activity Management Plan                          | Plan to implement a waste management plan                                                                          | Yes                               | Plan: options                  | Desktop             | Waste Management      |

|      |             |                                                                                           |                                                                 |     |               |               |                   |
|------|-------------|-------------------------------------------------------------------------------------------|-----------------------------------------------------------------|-----|---------------|---------------|-------------------|
| 2009 | Hawke's Bay | HIA on Flaxmere Town Centre Urban Design Framework Proposal                               | Area plan to influence land-use planning                        | Yes | Plan: options | Desktop       | Land-use          |
| 2009 | Hawke's Bay | HIA on implementation of Oral Health Strategy: Location of a community clinic in Flaxmere | Project aimed to implement oral health strategy                 | Yes | Project       | Intermediate  | Health service    |
| 2009 | Waikato     | Age-Friendly Community Shaping the Future for Waihi beach                                 | Plan to inform the future land-use of a beachside community     | Yes | Plan: options | Intermediate  | Community Service |
| 2009 | Auckland    | Regional Land and Transport Strategy HIA                                                  | Project to implement a regional land transport strategy         | No  | Policy        | Comprehensive | Transportation    |
| 2009 | Auckland    | Manukau Built Form and Spatial Structure Plan HIA Report                                  | Land-use plan for a particular area                             | Yes | Plan: options | Intermediate  | Land use          |
| 2008 | SA          | EFHIA South Australian Better Health Initiative School and Community Initiatives          | Implementation of a state-wide school and community initiative  | No  | Program       | Intermediate  | Health service    |
| 2008 | QLD         | HIA Flinders Street Redevelopment Project                                                 | Program to look at redevelopment of a CBD main street           | No  | Project       | Rapid         | Land-use          |
| 2008 | NSW         | Good for Kids, Good for Life EFHIA                                                        | Implementation of a state-wide school and community initiative  | Yes | Program       | Rapid         | Health service    |
| 2008 | NSW         | HIA Lithgow City Council Strategic Plan                                                   | Plan to implement land-use Strategic plan from local government | No  | Plan: options | Intermediate  | Land-use          |
| 2008 | VIC         | Leopold Strategic Footpath Network HIA                                                    | Plan to implement a strategic footpath network in CBD           | No  | Project       | Intermediate  | Land-use          |
| 2008 | NSW         | Oran Park and Turner Road                                                                 | Land-use plan aimed at a                                        | No  | Plan: options | Intermediate  | Land-use          |

|      |             |                                                                               |                                                                                              |     |               |              |                   |
|------|-------------|-------------------------------------------------------------------------------|----------------------------------------------------------------------------------------------|-----|---------------|--------------|-------------------|
|      |             | HIA                                                                           | particular area                                                                              |     |               |              |                   |
| 2008 | VIC         | A Matter of Equity — Case Study, Frankston City Council                       | Land-use plan aimed at a particular area                                                     | No  | Program       | Rapid        | Food              |
| 2008 | VIC         | SHIA of Dandenong High School Doveton Campus closure                          | Plan to for a school closure and amalgamation of its students into other schools in the area | No  | Project       | Intermediate | Education         |
| 2008 | NSW         | SIA Potts Hill                                                                | Plan to redevelop a particular area                                                          | Yes | Plan: options | Rapid        | Land-use          |
| 2008 | WA          | Health Impacts of Climate Change Adaptation Strategies for WA                 | Plan of scenarios and state-wide strategies to adapt to climate change                       | No  | Plan: options | Intermediate | Climate change    |
| 2008 | Canterbury  | HIA Central Plains Water Scheme                                               | Proposed irrigation scheme for 60,000 ha of land                                             | Yes | Plan: options | Rapid        | Water             |
| 2008 | Wellington  | HIA of Regional Policy Statement Regional Form and Energy Draft Provisions    | Policy implemented on regional land-use and energy provision                                 | No  | Policy        | Rapid        | Land use          |
| 2008 | Auckland    | Ranui Urban Concept Plan HIA                                                  | Land-use plan for a particular area                                                          | No  | Plan: options | Intermediate | Land use          |
| 2008 | Auckland    | HIA McLennan Housing Development                                              | Plan to implement housing development types                                                  | No  | Plan: options | Rapid        | Housing           |
| 2008 | Otago       | Proposed Liquor Restriction Extensions in North Dunedin HIA                   | Plan to implement liquor restrictions in student neighbourhood                               | Yes | Policy        | Intermediate | Harm minimisation |
| 2008 | Waikato     | Tokoroa Warm Homes Clean Air Project: Health and Well-being Impact Assessment | Plan to change air quality standards                                                         | No  | Plan: options | Rapid        | Air               |
| 2008 | Hawke's Bay | HIA on Draft Hastings district Council Graffiti Vandalism Strategy            | Program to implement graffiti strategies                                                     | Yes | Plan: options | Rapid        | Community Service |
| 2007 | VIC         | HIA Hobson Bay Urban Greywater Diversion Project                              | Land-use plan for a particular area                                                          | No  | Plan: options | Rapid        | Water             |

|             |            |                                                                                                                         |                                                             |            |                      |                      |                  |
|-------------|------------|-------------------------------------------------------------------------------------------------------------------------|-------------------------------------------------------------|------------|----------------------|----------------------|------------------|
| 2007        | NSW        | HIA Coffs Harbour Our Living City Settlement Strategy                                                                   | Land-use plan for a particular area                         | No         | Plan: options        | Intermediate         | Land-use         |
| 2007        | NSW        | Greater Western Sydney Urban Development HIA                                                                            | Land-use plan for a particular area                         | Yes        | Policy               | Intermediate         | Land-use         |
| 2007        | NSW        | HIA of Redevelopment of Liverpool Hospital                                                                              | Project to redevelop a hospital                             | Yes        | Project              | Intermediate         | Health service   |
| 2007        | WA         | HIA of Landfill Site and Housing Development in Mundijong, WA                                                           | Plan to introduce a landfill site and housing development   | No         | Plan: options        | Intermediate         | Land-use         |
| 2007        | NSW        | HIA of Car Park Waste Encapsulation Remediation                                                                         | Plan to implement waste remediation for a car park          | Yes        | Plan: options        | Rapid                | Waste Management |
| 2007        | QLD        | SIA of Gatton Correctional Facility                                                                                     | Plan to implement a Correctional facility                   | Yes        | Plan: options        | Comprehensive        | Institution      |
| 2007        | NSW        | HIA on Rural Health Service Redesign Proposal                                                                           | Plan to redesign a rural health service                     | Yes        | Plan: options        | Comprehensive        | Health service   |
| <b>2007</b> | <b>NSW</b> | <b>Bonnyrigg Living Communities SIA</b>                                                                                 | <b>Land-use and regeneration for a particular area</b>      | <b>No</b>  | <b>Project</b>       | <b>Comprehensive</b> | <b>Housing</b>   |
| 2007        | Far North  | Kerikeri-Waipapa Draft Structure Plan                                                                                   | Land-use plan for a particular area                         | No         | Plan: options        | Intermediate         | Land-use         |
| <b>2006</b> | <b>NSW</b> | <b>HIA of Greater Granville Regeneration Strategy</b>                                                                   | <b>Land-use and regeneration for a particular area</b>      | <b>Yes</b> | <b>Plan: options</b> | <b>Rapid</b>         | <b>Land-use</b>  |
| 2006        | NSW        | HIA of indigenous environmental health workers                                                                          | Plan to introduce an indigenous environmental health worker | Yes        | Plan: options        | Intermediate         | Health service   |
| 2006        | NSW        | Rapid Equity Focused HIA of the Australian Better Health Initiative: assessing the NSW components of priorities 1 and 3 | Health program to be implemented across a state             | No         | Program              | Intermediate         | Health service   |
| 2006        | NSW        | Wollongong Foreshore Precinct Plan                                                                                      | Land-use plan for a particular area                         | Yes        | Plan: options        | Desktop              | Land-use         |

|             |                   |                                                                                   |                                                             |           |                      |               |                   |
|-------------|-------------------|-----------------------------------------------------------------------------------|-------------------------------------------------------------|-----------|----------------------|---------------|-------------------|
| 2006        | NSW               | <b>Bungendore HIA: urban development in a rural setting</b>                       | <b>Land-use plan for a particular area</b>                  | Yes       | Plan: options        | Rapid         | Land-use          |
| 2006        | NSW               | SIA of Lower Hunter Regional Strategy                                             | Land-use plan for a regional area                           | Yes       | Plan: options        | Intermediate  | Land-use          |
| 2006        | VIC               | HIA in the East Gippsland Shire Council five-year arts and culture strategic plan | Art and cultural program implemented for local government   | Yes       | Program              | Desktop       | Community Service |
| 2006        | VIC               | HIA in the East Gippsland Shire Council Kerbside Waste Collection Strategy        | Plan to implement a waste management plan                   | Yes       | Program              | Rapid         | Waste Management  |
| 2006        | NSW               | HIA on an integrated disease prevention campaign                                  | Plan to implement an integrated disease prevention campaign | Yes       | Plan: options        | Rapid         | Health service    |
| 2006        | Marlborough       | Wairau Road Widening HIA                                                          | Project to expand a suburban road works                     | No        | Project              | Rapid         | Transportation    |
| 2006        | Wellington        | HIA of Greater Wellington Regional Land Transport Strategy                        | Policy implemented on regional land use                     | No        | Policy               | Rapid         | Transportation    |
| 2006        | New Zealand       | HIA Healthy Wealthy and Wise Future Currents Electricity Scenarios 2005-2050      | Plan to implement new energy saving provisions              | No        | Plan: options        | Intermediate  | Energy            |
| <b>2006</b> | <b>Canterbury</b> | <b>HIA Greater Christchurch Urban Development Strategy options</b>                | <b>Land-use plan aimed for a particular area</b>            | <b>No</b> | <b>Plan: options</b> | <b>Rapid</b>  | <b>Land-use</b>   |
| 2006        | Marlborough       | SIA of the Draft Nelson City Council Gambling Policy                              | Implementation of a gambling policy                         | No        | Policy               | Rapid         | Harm minimisation |
| 2006        | Auckland          | HIA of Mangere Growth Centre Plan                                                 | Plan to manage growth                                       | No        | Plan: options        | Rapid         | Land-use          |
| 2005        | QLD               | HSIA of South East Queensland Regional Plan                                       | Prospective population state-wide strategies                | No        | Plan: options        | Comprehensive | Land-use          |
| 2005        | Auckland          | Avondale's Future Framework                                                       | Land-use plan for a particular                              | Yes       | Plan: options        | Rapid         | Land-use          |

Rapid HIA

area
